# Supplementary material for: Towards a Rapid-Turnaround Low-Depth Unbiased Metagenomics Sequencing Workflow on the Illumina Platforms
Source: MDPI journal article supplement (doi:10.3390/bioengineering10050520), 2023-04-25
Supplement: s1 [file s1]

## Supplementary Material

### 1 Supplementary Figures and Tables

#### 1.1 Supplementary Figures

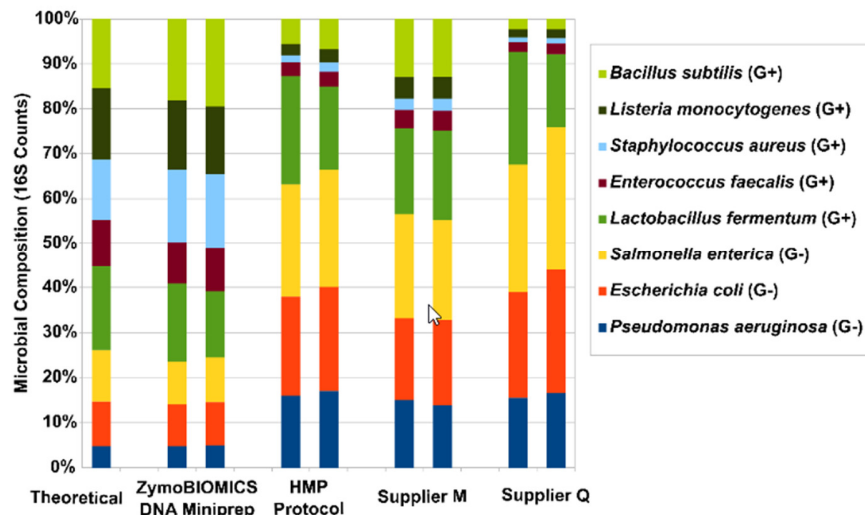

**Supplementary Figure S1.** Zymobiomics theoretical spike-in composition based on 16S rRNA amplicon sequencing (1).

## 1.2 Supplementary Tables

| Species                         | Theoretical Composition (%) |          |           |             |             | Gram Stain |
|---------------------------------|-----------------------------|----------|-----------|-------------|-------------|------------|
|                                 | Genomic DNA                 | 16S Only | 16S & 18S | Genome Copy | Cell Number |            |
| <i>Pseudomonas aeruginosa</i>   | 12                          | 4.2      | 3.6       | 6.1         | 6.1         | -          |
| <i>Escherichia coli</i>         | 12                          | 10.1     | 8.9       | 8.5         | 8.5         | -          |
| <i>Salmonella enterica</i>      | 12                          | 10.4     | 9.1       | 8.7         | 8.8         | -          |
| <i>Lactobacillus fermentum</i>  | 12                          | 18.4     | 16.1      | 21.6        | 21.9        | +          |
| <i>Enterococcus faecalis</i>    | 12                          | 9.9      | 8.7       | 14.6        | 14.6        | +          |
| <i>Staphylococcus aureus</i>    | 12                          | 15.5     | 13.6      | 15.2        | 15.3        | +          |
| <i>Listeria monocytogenes</i>   | 12                          | 14.1     | 12.4      | 13.9        | 13.9        | +          |
| <i>Bacillus subtilis</i>        | 12                          | 17.4     | 15.3      | 10.3        | 10.3        | +          |
| <i>Saccharomyces cerevisiae</i> | 2                           | NA       | 9.3       | 0.57        | 0.29        | Yeast      |
| <i>Cryptococcus neoformans</i>  | 2                           | NA       | 3.3       | 0.37        | 0.18        | Yeast      |

**Supplementary Table S1.** ZymoBIOMICS Microbial Community Standard (Zymo Research, Cat no. D6300) consist of 8 bacterial strains (3 Gram-negative and 5 Gram-positive) and 2 tough-to-lyse yeasts at a concentration of  $1.4 \times 10^{10}$  cells/mL (1).

| Platform | Dilution Factor | No. of cells per mL of plasma | Categories            | % of Reads (HostEL treated) | % of Reads (No treatment) | Fold Enrichment of Microbial reads |
|----------|-----------------|-------------------------------|-----------------------|-----------------------------|---------------------------|------------------------------------|
| iSeq 100 | 1:100           | ~1.4 million                  | Homo sapiens          | 86.94%                      | 93.18%                    | -                                  |
|          |                 |                               | Non Human             | 0.41%                       | 0.23%                     |                                    |
|          |                 |                               | <b>Zymo Spike-ins</b> | <b>12.65%</b>               | <b>6.61%</b>              | <b>1.915</b>                       |
|          | 1:250           | ~560 000                      | Homo sapiens          | 90.70%                      | 96.05%                    | -                                  |
|          |                 |                               | Non Human             | 0.37%                       | 0.15%                     |                                    |
|          |                 |                               | <b>Zymo Spike-ins</b> | <b>8.94%</b>                | <b>3.80%</b>              | <b>2.355</b>                       |
|          | 1:1000          | ~140 000                      | Homo sapiens          | 96.36%                      | 98.99%                    | -                                  |
|          |                 |                               | Non Human             | 0.24%                       | 0.15%                     |                                    |
|          |                 |                               | <b>Zymo Spike-ins</b> | <b>3.40%</b>                | <b>0.87%</b>              | <b>3.932</b>                       |
|          | 1:2000          | ~70 000                       | Homo sapiens          | 98.46%                      | 99.53%                    | -                                  |
|          |                 |                               | Non Human             | 0.21%                       | 0.14%                     |                                    |
|          |                 |                               | <b>Zymo Spike-ins</b> | <b>1.32%</b>                | <b>0.33%</b>              | <b>3.952</b>                       |
|          | No Spike        | N.A.                          | Homo sapiens          | 99.87%                      | 99.76%                    | -                                  |
|          |                 |                               | Non Human             | 0.08%                       | 0.15%                     |                                    |
|          |                 |                               | <b>Zymo Spike-ins</b> | <b>0.04%</b>                | <b>0.09%</b>              | <b>0.407</b>                       |
| MiniSeq  | 1:100           | ~1.4 million                  | Homo sapiens          | 83.87%                      | 91.79%                    | -                                  |
|          |                 |                               | Non Human             | 0.46%                       | 0.28%                     |                                    |
|          |                 |                               | <b>Zymo Spike-ins</b> | <b>15.64%</b>               | <b>7.91%</b>              | <b>1.977</b>                       |
|          | 1:250           | ~560 000                      | Homo sapiens          | 87.76%                      | 95.30%                    | -                                  |
|          |                 |                               | Non Human             | 0.46%                       | 0.16%                     |                                    |
|          |                 |                               | <b>Zymo Spike-ins</b> | <b>11.75%</b>               | <b>4.53%</b>              | <b>2.594</b>                       |
|          | 1:1000          | ~140 000                      | Homo sapiens          | 93.33%                      | 98.21%                    | -                                  |
|          |                 |                               | Non Human             | 2.42%                       | 0.65%                     |                                    |
|          |                 |                               | <b>Zymo Spike-ins</b> | <b>4.24%</b>                | <b>1.13%</b>              | <b>3.752</b>                       |
|          | 1:2000          | ~70 000                       | Homo sapiens          | 97.50%                      | 98.19%                    | -                                  |
|          |                 |                               | Non Human             | 0.44%                       | 0.51%                     |                                    |
|          |                 |                               | <b>Zymo Spike-ins</b> | <b>2.05%</b>                | <b>1.31%</b>              | <b>1.565</b>                       |
|          | No Spike        | N.A.                          | Homo sapiens          | 99.50%                      | 98.76%                    | -                                  |
|          |                 |                               | Non Human             | 0.15%                       | 1.14%                     |                                    |
|          |                 |                               | <b>Zymo Spike-ins</b> | <b>0.34%</b>                | <b>0.10%</b>              | <b>3.4</b>                         |

**Supplementary Table S2.** Detailed breakdown of percentage of reads of HostEL treated vs no treatment enrichment on iSeq 100 and MiniSeq sequencing platforms. HostEL can enrich the percentage of reads by ~2 fold in plasma with high microbial concentrations (1.4 million cells/mL) and ~4 fold with low microbial concentration (140,000 cells/mL and 70,000 cells/mL) on iSeq 100 sequencing platform while enriching at least 1.5 fold on MiniSeq sequencing platform.

| Pathogen               | Primer      | Primer Sequence                               | Reference |
|------------------------|-------------|-----------------------------------------------|-----------|
| BK virus               | F           | 5'-AGT GTT GAG AAT CTG CTG TTG CTT-3'         | (2)       |
|                        | R           | 5'-GGG ATG AAG ATT TAT TTT GCC ATG AAG AT-3'  |           |
| Dengue Virus           | F           | 5'-GCA TAT TGA CGC TGG GAR AGA C-3'           | (3)       |
|                        | R (DENV1-3) | 5'-TTC TGT GCC TGG AAT GAT GCT G-3'           |           |
|                        | R (DENV4)   | 5'-YTC TGT GCC TGG ATW GAT GTT G-3'           |           |
| Hepatitis B virus      | F           | 5'- TTC CGG AAA CTA CTG TTG TTA GAC-3'        | (4)       |
|                        | R           | 5'- ATT GAG ATT CCC GAG ATT GAG A-3'          |           |
| Hepatitis C virus      | F           | 5'-GTC TGC GGA ATC GGT GAG TAC A-3'           | (5)       |
|                        | R           | 5'-CTA TCA GGC AGT ACC ACA AGG-3'             |           |
| Hepatitis E virus      | F           | 5'-AAT AAA TCA TAA GGT GGT TTC TGG GGT GAC-3' | (6)       |
|                        | R           | 5'-AAT AAA TCA TAA GGG GTT GGT TGG ATG AA-3'  |           |
| Varicella-Zoster Virus | F           | 5'-CAA AGC GGG TCC ATC CCT-3'                 | (7)       |
|                        | R           | 5'-ACC TGG CCT TTG CCG G-3'                   |           |

**Supplementary Table S3.** List of targeted primers used in qPCR validation of clinical samples.

| Samples | qPCR Ct Value | Frac Reads | Raw Reads Counts | Platform | Clinical Diagnosis |
|---------|---------------|------------|------------------|----------|--------------------|
| B047    | 43.8          | 0.00E+00   | 0                | iSeq 100 | Hepatitis B virus  |
| B046    | UD            | 0.00E+00   | 0                |          |                    |
| B050    | UD            | 0.00E+00   | 0                |          |                    |
| B048    | 38.6          | 8.00E-05   | 2                |          |                    |
| B049    | 29.5          | 8.05E-03   | 118              |          |                    |
| B017    | 24.4          | 2.11E-02   | 495              |          |                    |
| B016    | 17.9          | 8.64E-02   | 4238             |          |                    |
| B045    | 22.1          | 3.32E-01   | 7427             |          |                    |
| B047    | 43.8          | 0.00E+00   | 0                | MiniSeq  |                    |
| B046    | UD            | 0.00E+00   | 0                |          |                    |
| B050    | UD            | 0.00E+00   | 0                |          |                    |
| B048    | 38.6          | 2.00E-05   | 2                |          |                    |
| B049    | 29.5          | 7.80E-03   | 318              |          |                    |
| B017    | 24.4          | 0.02203    | 1226             |          |                    |
| B016    | 17.9          | 0.09309    | 11394            |          |                    |
| B045    | 22.1          | 3.77E-01   | 23336            |          |                    |

**Supplementary Table S4.** qPCR and iSeq 100/MiniSeq sequencing results of Hepatitis B plasma samples

## 2 References

1. ZymoBIOMICS™ Microbial Community Standard (D6300) [Internet]. [cited 2022 Mar 29]. Available from: [https://files.zymoresearch.com/protocols/\\_d6300\\_zymobiomics\\_microbial\\_community\\_standard.pdf](https://files.zymoresearch.com/protocols/_d6300_zymobiomics_microbial_community_standard.pdf)
2. Pinto GG, Poloni JAT, Paskulin DDA, Spuldaro F, Paris F de, Barth AL, et al. Quantitative detection of BK virus in kidney transplant recipients: a prospective validation study. *Jornal Brasileiro de Nefrologia* [Internet]. 2018 Jan 1 [cited 2022 May 11];40(1):59. Available from: [/pmc/articles/PMC6533964/](https://pubmed.ncbi.nlm.nih.gov/30111111/)
3. Alm E, Lesko B, Lindegren G, Ahlm C, Söderholm S, Falk KI, et al. Universal Single-Probe RT-PCR Assay for Diagnosis of Dengue Virus Infections. *PLoS Negl Trop Dis* [Internet]. 2014 Dec 18 [cited 2022 May 11];8(12). Available from: [/pmc/articles/PMC4270494/](https://pubmed.ncbi.nlm.nih.gov/26611111/)
4. Liu C, Chang L, Jia T, Guo F, Zhang L, Ji H, et al. Real-time PCR assays for hepatitis B virus DNA quantification may require two different targets. *Virol J* [Internet]. 2017 May 12 [cited 2022 May 11];14(1). Available from: [/pmc/articles/PMC5427580/](https://pubmed.ncbi.nlm.nih.gov/28111111/)
5. Warkad SD, Nimse SB, Song KS, Kim T. Development of a Method for Screening and Genotyping of HCV 1a, 1b, 2, 3, 4, and 6 Genotypes. *ACS Omega* [Internet]. 2020 May 19 [cited 2022 May 11];5(19):10794–9. Available from: <https://pubs.acs.org/doi/full/10.1021/acsomega.0c00386>
6. Germer JJ, Ankoudinova I, Belousov YS, Mahoney W, Dong C, Meng J, et al. Hepatitis e virus (HEV) detection and quantification by a real-time reverse transcription-PCR assay calibrated to the world health organization standard for HEV RNA. *J Clin Microbiol* [Internet]. 2017 May 1 [cited 2022 Oct 7];55(5):1478–87. Available from: <https://journals.asm.org/doi/10.1128/JCM.02334-16>
7. Harbecke R, Oxman MN, Arnold BA, Ip C, Johnson GR, Levin MJ, et al. A Real-Time PCR Assay to Identify and Discriminate Among Wild-Type and Vaccine Strains of Varicella-Zoster Virus and Herpes Simplex Virus in Clinical Specimens, and Comparison With the Clinical Diagnoses. *J Med Virol*. 2009;81(7):1310–22.
